# Supplementary material for: Anatomical structure overrides temperature controls on magnesium uptake -- calcification in the Arctic/subarctic coralline algae Leptophytum laeve and Kvaleya epilaeve (Rhodophyta; Corallinales)
Source: Copernicus journal article supplement (doi:10.5194/bg-2017-180), 2017-05-23
Supplement: Supplementary file [file bg-2017-180-AC2-supplement.pdf]

1 ANATOMICAL STRUCTURE OVERRIDES TEMPERATURE CONTROLS ON  
2 MAGNESIUM UPTAKE - CALCIFICATION IN THE ARCTIC/SUBARCTIC  
3 CORALLINE ALGAE *LEPTOPHYTUM LAEVE* AND *KVALEYA EPILAEVE*  
4 (RHODOPHYTA; CORALLINALES)

5 Merinda C. Nash

6 Walter Adey

7 Department of Botany, National Museum of Natural History, Smithsonian Institution,  
8 Washington, DC, USA, 20560

9

10 Author for correspondence: [nashm@si.edu](mailto:nashm@si.edu)

11 Running title: Magnesium and anatomy in coralline algae

12 Key words: Coralline algae, calcification, biomineralization, magnesium, temperature,  
13 proxy

14

15

16 Abstract

17

18 Calcified coralline red algae are ecologically key organisms in photic benthic  
19 environments. In recent decades they have become important climate proxies, especially  
20 in the Arctic and Subarctic. It has been widely accepted that Magnesium content in  
21 coralline tissues is directly a function of ambient temperature, and this is a primary basis  
22 for their value as a climate archive. In this paper we show for two genera of  
23 Arctic/Subarctic corallines, *Leptophytum laeve* and *Kvaleya epilaeve*, that previously  
24 unrecognized complex tissue and cell wall anatomy bears a variety of basal signatures for  
25 Mg content, with the accepted temperature relationship being secondary. The  
26 interfilament carbonate has lower Mg than adjacent cell walls and the hypothallial cell  
27 walls have the highest Mg content. The internal structure of the hypothallial cell walls  
28 can differ substantially from the perithallial radial cell wall structure. Using high-  
29 magnification Scanning Electron Microscopy and etching we expose the nm-scale  
30 structures within the cell walls and interfilament. Fibrils concentrate at the internal and  
31 external edges of the cell walls. Fibrils ~10 nm thick appear to thread through the radial  
32 Mg-calcite grains and form concentric bands within the cell wall. This banding may  
33 control Mg distribution within the cell. Similar fibril banding is present in the  
34 hypothallial cell walls but not the interfilament. Climate archiving with corallines can  
35 achieve greater precision with recognition of these parameters. This paper is part of a  
36 series of investigations on controls on Mg uptake and distribution within the crusts of a  
37 range of coralline genera.

38 **Introduction**

39 Understanding tissue complexity and the structural organization of cell wall calcification  
40 in coralline algae is important for many reasons, including the growing use of these  
41 organisms as climate proxies and concern for the ecological effects of ocean acidification.  
42 There is a burgeoning interest in using coralline crusts as environmental proxies for late  
43 Holocene temperature (Hetzinger et al. 2009, Gamboa et al. 2010, Halfar et al. 2010),  
44 arctic ice sheet coverage (Halfar et al. 2013) and pH changes with time (Krayesky-Self et  
45 al. 2016). Typically magnesium content is used as a key indicator of late Holocene  
46 temperature fluctuations (Adey et al. 2013). Yet despite this utilization of coralline  
47 carbonate crusts for proxy climate research, there has been little study of tissue and  
48 cellular-scale physiology as it relates to the distribution of magnesium within the crust.  
49 Nor are the basic mechanisms of calcification fully understood (Adey 1998). This is in  
50 stark contrast to the status of other calcifiers used for proxy work, e.g. corals (Barnes and  
51 Lough 1993), foraminifera (Bentov and Erez 2005) and bivalves (Wanamaker et al. 2008).  
52 However, these well-known climate proxies have little application in the Arctic Region  
53 of greatest climate change affects (Adey et al. 2013), and without a greater understanding  
54 of coralline calcification physiology, precision proxy analysis of temperature and other  
55 environmental conditions, using coralline algae, is limited.

56  
57 One of the key roles of corallines is the building of carbonate substrate that underpins  
58 many ecosystems globally. For example, the thick bioherms found in coral reef  
59 structures (Adey 1978a, b, 1998), the extensive rhodolith beds off South American  
60 (Amado-Filho et al. 2012, Bahia et al. 2010) and Australian (Harvey et al. 2016) shores,

61 maerl substrate in the Mediterranean (Martin et al. 2014) and the dominant rocky benthos  
62 biostromes and rhodoliths in many Arctic and Subarctic environments (Adey et al. 2013).  
63 There are concerns that as atmospheric  $p\text{CO}_2$  increases and consequent ocean  
64 acidification increases, there will be negative impacts on the capacity of corallines to  
65 continue building these important substrates (e.g. McCoy and Kamenos 2014). The pace  
66 of research on the effects of temperature and climate change on coralline algae has  
67 outpaced both the published data on anatomy and our understanding of the biochemical  
68 processes controlling their carbonate skeletal building. For developing reliable past  
69 climate proxy information using corallines and anticipating future climate change impacts  
70 on these keystone calcifiers, as with any other organism, it is first necessary to understand  
71 how these algae organize their tissues, build their skeleton and control cellular-scale  
72 magnesium content.

73

74 While numerous studies of coralline growth rates under a wide range of temperature and  
75 light conditions have been published (Adey and McKibben 1970, Adey 1970, 1973, Adey  
76 and Vassar 1975, [Kamenos et al. 2008](#), [Diaz-Pulido et al. 2014](#), [Vásquez-Elizondo &](#)  
77 [Enriquez 2016](#)), little attempt has been made to relate this information to calcification  
78 processes. Also, it is only recently, with the use of higher magnification scanning electron  
79 microscopy (SEM) (Adey et al. 2005, 2015a) that the earlier implications of anatomical  
80 complexity (Adey 1964, 1965, 1966a, [Cabiocch and Giraud 1986](#)) have been fully  
81 appreciated. It has been proposed that calcification is a result of locally elevated pH  
82 during photosynthesis leading to super-saturation and associated mineral precipitation  
83 (Ries 2010). However, some parasitic corallines lack photosynthetic pigments, and have

84 haustoria to derive nutrition from their hosts, yet present typical tissue and calcified wall  
85 structures (Adey and Sperapani 1971, Adey et al.1974). Also, anatomical and magnesium  
86 content studies of Arctic corallines demonstrate that growth continues in Arctic winter  
87 darkness (Halfar et al. 2011, Adey et al. 2013). There has been an experiment recording  
88 continued calcification at night and in the dark (experiment in progress) indicating that  
89 calcification is not likely a straight forward association with micro-saturation state, as  
90 seen in some algae (e.g., *Halimeda*, Adey 1998, Sinutok et al. 2012).

91

92 Following on from the classical coralline studies, maturing around the turn of the 19<sup>th</sup>  
93 century, Adey (1964, 1965,1966a,b) laid out the basic tissue-structured anatomy of  
94 crustose corallines, adding the epithallium, intercalary meristem and cellular elongation  
95 (while calcified) to the classical model of perithallium and hypothallium. Later, SEM  
96 (Adey et al. 2005, Adey et al.2012) demonstrated greater sub-tissue complexity and  
97 added the calcified cell wall components inner wall (IW) and interfilament (IF). In this  
98 paper, we rename the inner wall the cell wall and retain the terminology interfilament,  
99 noting this is equivalent to the middle lamella in higher plants (Esau 1953); interfilament  
100 has also been referred to as interstitial (Ragazzola et al. 2016). We use the abbreviations  
101 PCW and PIF (perithallial cell wall and perithallial interfilament) and HCW and HIF  
102 (hypothallial cell wall and interfilament) to designate the carbonate wall components. It  
103 should be noted that while the interfilament is a minor component of total calcification in  
104 the species of this paper, it can be a major component in some genera (Adey et al. 2013,  
105 2015a).

106

107 In this paper, we show for the first time the cellular-scale and anatomical controls on  
108 magnesium distribution within the carbonate skeletons of two Arctic/Subarctic coralline  
109 species. These are *Leptophytum leave* (Stromfelt) Adey, and the epiphytic (and non-  
110 photosynthetic parasitic) *Kvaleya epilaeve* Adey and Sperapani, from the northern  
111 Labrador Coast. *L. leave* is photosynthetic and forms expansive, but thin crusts (to one  
112 mm in thickness) generally on shell fragments and pebbles in deeper water (Adey 1966a,  
113 1970). *K. epilaeve* is an epiphytic parasite, lacking in photosynthetic pigment, and  
114 producing hypothalial haustoria that penetrate upper perithalial cells of *L. leave* (Adey  
115 and Sperapani 1971). It is similar in physiology to the North Pacific Subarctic parasite  
116 *Ezo epiyessoense* (Adey et al. 1974), which, along with its host *Lithophyllum yessoense*,  
117 lies in a distantly related coralline group. *K. epilaeve* is the only known Arctic genus of  
118 algae (Adey et al. 2008) and is absent or of very limited occurrence in Subarctic waters,  
119 where the host continues to be abundant (Adey and Sperapani 1971). Understanding and  
120 contrasting calcification within these two species, both growing in the same temperature,  
121 light and pH conditions, offers an opportunity to examine the wide variance of Mg  
122 content as a function of skeletal anatomy and metabolic processes.

123

## 124 **Methods**

### 125 *Sample collection and site information*

126 The sample was collected on 22<sup>nd</sup> July 2013, at the commencement of Arctic summer,  
127 from 16-18 m depth at inner Port Manvers Bay, Labrador. The collection site lies at 56°  
128 57.1' N; 61° 32.8' W., near the northern end of the 50 km long Port Manvers Run, a  
129 north/south passageway inside of S. Aulatsivik Island (Fig. 1A, C). Sea ice is extensive

130 from November through early July, and the inter-island passages and bays are covered  
131 with snow-covered land fast sea ice through much of that period. At the collection site,  
132 the bottom was a shell/pebble gravel bed primarily of shell fragments and pebbles  
133 encrusted with *L. leave*, *L. foecundum* and *Clathromorphum compactum*; scattered coarse  
134 rhodolith *Lithothamnion glaciale* and *Lithothamnion tophiforme* were also present (Fig.  
135 | [1B, D](#)). *K. epilaeve* occurred on *L. leave* and *L. leave* grew on both sides of the shell  
136 fragments. Salinity was measured using electronic induction instrumentation and was 30  
137 ppt. November to July near surface water temperatures, below the sea ice, are within the -  
138 1.5 to -1.8° C range. Bottom summer temperature measured at the site on 22<sup>nd</sup> July 2013  
139 was 0.5°C. Since this is relatively early in the summer season, peak temperatures are  
140 likely to be between 3-5°C (Adey et al. 2015) with a mean growing season temperature of  
141 ~ 2 ° C. This mean estimate is based on measurements from eight sites in the region (182  
142 km S to 35 km N) with surface to bottom temperature records for 1964 (Adey 1966c) and  
143 2013 (Adey et al. 2015). These ranged from 1.9 to 5.6° C during summer at 15-20 m. The  
144 snow-covered land fast sea ice overlying the gravel rhodolith bed from which the samples  
145 were taken likely precludes significant solar energy from reaching the bottom for eight  
146 months of each year.

147

148 Species identification was made by WHA. The original sample is 2013-11(1) at the  
149 National Museum of Natural History.

150

#### 151 **Analytical methods**

152 *Scanning electron microscopy- energy dispersive spectroscopy (SEM-EDS)*

Rob Nash 8/9/17 12:54 PM

Deleted: B

154 The CCA sample was fractured, mounted using carbon tape and platinum coated prior to  
155 scanning electron microscopy energy dispersive spectroscopy (SEM-EDS). For these  
156 analyses, we used a Zeiss UltraPlus field emission scanning electron microscope  
157 (FESEM) equipped with an HKL electron backscatter diffraction (EBSD) operated at 15  
158 kV, 11 mm working distance. SEM was carried out at the Australian National University  
159 Centre for Advanced Microscopy. SEM-EDS was used for spot analyses to quantify the  
160 elemental composition of representative parts of the CCA crust. A range of SEM settings  
161 were used for imaging. The more common secondary (SE) electron showing topography,  
162 backscatter electron imaging (BSE) which shows higher magnesium areas as darker  
163 carbonate and is useful for rapid visual identification of mineral distribution.

164

165 A second round of EDS was undertaken using a NOVA NanoSEM FEI at the National  
166 Museum of Natural History's Department of Mineralogy. Typically EDS measurements  
167 are made using 15 kV (Nash et al. 2011) so that there is enough energy to dislodge  
168 electrons from a range of elements, e.g. from lighter magnesium up to heavier strontium.  
169 The EDS beam interacts with a roughly spherical-shaped region of carbonate beneath the  
170 surface. This region is referred to as the interaction volume. At 15 kV the interaction  
171 volume is  $\sim 3 \mu\text{m}$  in diameter whereas the average cell wall thickness ranges from only  
172 500 nm up to  $\sim 2 \mu\text{m}$  (occasionally thicker, up to  $3 \mu\text{m}$ ). Interfilament in these species  
173 may be only a few grains wide, 200-500 nm up to  $2 \mu\text{m}$ . These narrow areas of interest  
174 in contrast to the larger beam interaction volume, pose a problem for obtaining accurate  
175 Mg measurements for only cell wall or interfilament. For example, a measurement of the  
176 cell wall may include minor amounts of carbonate from the adjacent interfilament and



177 vice versa. Generally even with this beam crossover, in our experience 15 kV is sufficient  
178 to identify a significant offset in magnesium while still collecting information that may  
179 be of interest such as strontium levels. However, where there are only a few grains of  
180 interfilament, as in the *L. leave*, the 3  $\mu\text{m}$  interaction volume is problematic. A range of  
181 EDS settings were tested aiming to reduce the beam interaction volume so that Mg  
182 content for each the cell wall and the interfilament could be individually measured  
183 without the beam crossing into the adjacent substrate. A setting of 7 kV, working distance  
184 6.4 mm and 1 nA current was used to measure the interfilament grains in the *L. leave*  
185 with a count time of 20 seconds. The sample was carbon coated. This was calculated to  
186 have an interaction volume of  $<1 \mu\text{m}$ . These results are reported separately to the main  
187 data set.

188

#### 189 *Sample preparation*

190 Initially the crust was fractured using shears and mounted in superglue. After first  
191 imaging of the fractured crust, the sample was polished using 2000 gsm wet and dry  
192 sandpaper then sonic cleaned in unbuffered deionized water for 2 minutes. This  
193 preparation was used for SEM EDS measurements; 8-9 measurements were made for  
194 each carbonate type of interest. Subsequently the sample was sonic cleaned in unbuffered  
195 deionized water for 20 minutes. The deionized water has a pH of  $\sim 6.5$ . When cleaned  
196 for 2 minutes the surface is very lightly etched allowing differentiation between different  
197 Mg-calcite morphologies without altering the measured Mg content. After cleaning for  
198 20 minutes there is a visible difference in the surface with much of the interfilament Mg-  
199 calcite and smaller grains removed allowing imaging of nm scale cellular structures.

Rob Nash 8/6/17 8:19 PM

Deleted: /

201

202 X-ray diffraction methods

203 Powder XRD was carried out using a SIEMENS D501 Bragg-Brentano diffractometer  
204 equipped with a graphite monochromator and scintillation detector, using CuK $\alpha$  radiation.

205 A subsample was broken off the edge of the crust. This piece included *L. laeve* with  
206 surficial *K. epilaeve*. The sample was ground using a mortar and pestle. Fluorite was  
207 added as an internal standard. The sample was not bleached and acetone was not added  
208 during the grinding as this has been found to occasionally induce alteration and  
209 precipitation of other minerals in other coralline samples we have worked with. Scan  
210 interpretation for mol% MgCO<sub>3</sub> followed the methods described by Nash et al. (2013).

211

212 *Temperature calibration*

213 Data for the graph in figure 5 taken from Halfar et al. (2010, 2013).

214

## 215 **Results**

216 *SEM imaging overview*

217 The specimen of *L. laeve* encased an aragonite carbonate shell. (Fig. 2A). The crust is  
218 approximately 500 microns thick (Fig. 2B) with a basal hypothallus ~80 microns thick. *K.*  
219 *epilaeve* has been considered to be an adelphoparasite, a species very closely related to its  
220 host. Although diminutive, and superficially appearing as scattered white sand grains, *K.*  
221 *epilaeve* can densely coat *L. laeve*. Although often appearing as densely crowded  
222 conceptacles, it can possess the full basic array of anatomical features: hypothallium,  
223 perithallium and epithallium (the latter mostly absent, Adey and Sperapani 1971) (Fig.  
224 2B). *L. laeve* typically has an epithallium that is one cell layer of rounded ovoid, thin

225 walled cells that are often absent in SEM sections. The *K. epilaeve* grows directly on the  
226 *L. laeve* meristem (Fig. 2C, D) and there was no evidence of excavation required (by  
227 borers or grazers), prior to settlement. This suggests that unlike the typical sloughing  
228 relationship with epiphytes wherein epithallium builds up under the epiphyte until it  
229 sloughs off, the *L. laeve* does not recognize *K. epilaeve* as foreign. The perithallial cell  
230 walls of *L. laeve* contain radially-oriented grains of Mg-calcite; the interfilament is thin  
231 and has carbonate grains randomly orientated in a plane parallel to the filament axis or  
232 cell top/ bottom. The interfilament shows up strongly as stripes on vertical fracture  
233 sections (Figs. 2B, C). Note for easiest viewing of the fine structures, the figure images  
234 are best viewed on screen rather than in print.

235

236 The first layer formed by the *K. epilaeve* has angular grains parallel to the *L. laeve*  
237 surface (Fig. 2E). The bottom part of the cell wall is without radial structure and has  
238 submicron beads appearing to calcify along and within organic fibrils (Fig. 2E). Organic  
239 fibrils are visible between the basal layer of *K. epilaeve* carbonate grains and the  
240 meristem of the *L. laeve* (Fig. 2F) suggesting a method of attachment in addition to the  
241 haustoria developed by some hypothallial cells (Adey and Sperapani 1971). There were  
242 no haustoria visible in our SEM sample. Fine radial grains typically observed in cells of *L.*  
243 *laeve* beneath the meristem were not apparent in the cell walls of the *L. laeve* meristem  
244 (Fig. 2E,F) suggesting this surficial carbonate may have been altered or remineralised  
245 during the attachment process.

246

247 *SEM-EDS*

248 Measurements for magnesium content in *Leptophytum leave* were undertaken on both the  
249 upper (side with conceptacles) and under (without conceptacles) crusts (Fig. 3A, D). The  
250 parasite, *Kvaleya epilaeve* was present on both surfaces (Fig. 2A, B Fig. 3A).

251 Measurements of *K. epilaeve* were made on the underside.

252

253 The Mg content of the perithallial and hypothallial cell walls of *L. leave* was measured

254 (Fig. 3A-D) as well as what appeared to be a transitional cell type between the basal

255 hypothallus and the typical perithallial cells (Fig. 2 D-F). These transitional cells are

256 within the perithallus but have thin cell walls similar to the hypothallial cells. There are

257 clear visual differences between the cell walls of the three cell types. The perithallial cell

258 walls are 1-2 microns wide with clearly radial Mg-calcite (Fig. 2B, F). The basal

259 hypothallial cells are elongated relative to the perithallial cells and their cell walls are

260 narrower and do not always show radial cell wall structure (Fig. 2C). The transitional

261 cells have elongate cells relative to the perithallus but less so than the hypothallus, and

262 their cell walls are thinner, ~ 0.5 – 1 micron and do not show radial structures. The

263 interfilament of *L. laeve* has only a single layer of Mg-calcite grains (Fig. 2B, F), as noted

264 above showing as a thin line on longitudinal axial fractures; fractures along the

265 interfilament appear as conspicuous vertical stripes (Figs. 2C).

266

267 The *K. epilaeve* in the portion of the sample mounted for SEM did not present the typical

268 elongated hypothallial cells as shown by Adey and Sperapani (1971), as this cut is not

269 longitudinally placed on a growing lobe. The key difference between the perithallus of

270 the *L. laeve* and *K. epilaeve* was the presence of wide (1-2 microns) areas of interfilament

Rob Nash 8/9/17 12:59 PM

Deleted: 2

Rob Nash 8/9/17 12:59 PM

Deleted: 2

Rob Nash 8/9/17 12:59 PM

Deleted: , B

Rob Nash 8/9/17 1:00 PM

Deleted: 2

275 | in the *K. epilaeve* (Fig. 3F, 4A, B). In many corallines (Adey et al. 2005), including the *L.*  
276 | *laeve* studied for this paper there is only a single layer of interfilament grains, and these  
277 | present as vertical stripes on vertical fractures (Fig. 3B). EDS measurements were taken  
278 | for both the *K. epilaeve* cell wall and interfilament (Fig. 4A, B). As the interaction  
279 | volume of the EDS beam is ~ 3 microns (Methods) and the cell wall and interfilament  
280 | thickness range from 1-3 microns, the values measured for both may include small  
281 | amounts of the other, although every effort was made to place the beam on the widest  
282 | part of the appropriate band. A second set of measurements was taken for the *L. laeve*  
283 | cell wall and interfilament using lower kV and the results are reported separately.

284

#### 285 *Mg content*

286 Bulk whole sample content of Mg, determined by powder XRD was 10.8 mol% MgCO<sub>3</sub>  
287 | (Mg/Ca 0.13). The EDS-determined average Mg content ranged from 9.1 (*K. epilaeve*  
288 | Perithallial interfilament) to 16.7 mol% MgCO<sub>3</sub> (*L. laeve* upper Hypothallial cell wall),  
289 | (Table 1, Fig.6). The highest measured individual Mg content, 19.6 mol% MgCO<sub>3</sub>, was  
290 | in the *L. laeve* upper crust HCW. Generally the Mg content of interfilament was lower  
291 | than cell walls, and perithallial cell walls had the highest Mg content. The lowest values  
292 | were for the *K. epilaeve* PIF and PCW, 9.1 and 10.1 mol% MgCO<sub>3</sub> respectively, not  
293 | significantly different at significance level of 0.05 but are significantly different at  
294 | significance level of 0.1 (p= 0.068) (Table 2). Keeping in mind the values for the cell  
295 | wall and interfilament include a small amount of carbonate from the other, we consider  
296 | the p=0.068 result likely does represent a true significant difference between the two. The  
297 | PCW for the *L. laeve* was slightly higher at 11.2 and 12.9 mol% MgCO<sub>3</sub> (under and

Rob Nash 8/9/17 1:01 PM

Deleted: A,

Rob Nash 8/9/17 1:04 PM

Deleted: 2

Rob Nash 8/9/17 1:04 PM

Deleted: 3

Rob Nash 8/6/17 8:26 PM

**Moved down [1]:** This XRD Mg content is within the range for average winter and summer Mg contents for *Clathromorphum compactum* collected from Arctic Bay, Kingitok and Quirpon (Halfar et al. 2011, 2013).

307 upper crust respectively), these were not significantly different from each other ( $p=0.112$ ).  
308 The combined average of the upper and under *L. leave* cell walls (12.2 mol%  $MgCO_3$ )  
309 was significantly higher ( $p=0.025$ ) than the *K. epilaeve* cell wall. However, comparing  
310 only the *L. leave* cell wall of the under crust, the same side as the *K. epilaeve*, there was  
311 no significant difference ( $p=0.124$ ). The greatest difference between the upper and under  
312 *L. laeve* crust was found between the hypothallial cell walls. The under HCW averaged  
313 12.3 mol%  $MgCO_3$ , whereas the upper HCW was 4.4 mol% higher at 16.7 mol%  $MgCO_3$ .  
314 The upper HCW was significantly higher than the *L. leave* PCW's but not different from  
315 the transitional CW's (15.6 mol%  $MgCO_3$ ). Based on the graph in figure 5 this upper  
316 range of Mg would equate to temperatures above 9.3°C, more than double the known  
317 summertime highs at the sampling site.

318

319 The results for comparison of the cell wall and interfilament grains in the *L. leave* using 7  
320 kV showed the interfilament, 8.5 mol%  $MgCO_3$  ( $n=6$ ), was significantly lower ( $p=0.001$ )  
321 than the cell wall, 11.1 mol%  $MgCO_3$  ( $n=8$ ).

322

### 323 **Structural features**

#### 324 *Cell wall*

325 Within the radial Mg-calcite structure (PCW) of the *K. epilaeve*, a concentric banding  
326 pattern is present (Fig. 7 A-C). The radial Mg-calcite grains are not always one  
327 continuous long grain. The banding is aligned to the presence of organic fibrils that  
328 appear regularly throughout the PCW (Fig. 7B). Organic fibrils, ~10 nm thick, are  
329 parallel to the cell wall edges. These are spaced 30-40 nm apart throughout the middle of

330 the cell wall. It appears that the fibrils are mineralized. At the outer edges of the cell wall  
331 the number of fibrils increases and appear as a dense mesh approaching a membrane (Fig.  
332 7B, C) that is infilled with carbonate. The parallel fibrils are connected to the radial Mg-  
333 calcite grains, appearing as if to continue through the grain (Fig. 7C), similar to fence  
334 wire threading through fence posts at pre-defined spacing. There are also fibrils that  
335 drape over the grains. Where the fibrils concentrate to a mesh, this is also calcified but  
336 with smaller grains without regular shape. In the *K. epilaeve* interfilament (PIF), the  
337 grains are aligned to the cell wall surface (Fig. 7C). Fibrils also run through the PIF and  
338 attach to the interfilament grains but not with the regular pattern seen in the cell wall.  
339 Looking at a cross section of the cell wall from the top down (Fig. 7D), the fibrils can be  
340 seen to form a dense mesh.  
341

342 Similar features are visible in the *L. laeve* PCW (Fig. 8A, B), although the organic fibrils  
343 are not as well exposed. Possibly these cell wall grains are less susceptible to dissolution  
344 in the etching treatment making it more difficult to expose the organic features. The  
345 radial cell wall grains appear anchored to the external edge of the cell wall, immediately  
346 adjacent the interfilament.

347

348 After etching for 20 minutes, more of the organic fibrils are exposed in the *K. epilaeve*  
349 interfilament (Fig. 9A) revealing a porous membrane. PIF grains have angular edges in  
350 contrast to the rounded sides of the cell wall grains. The *L. laeve* perithallial  
351 interfilament has rice-grain shaped Mg-calcite flattened against the external side of the  
352 cell wall (Fig. 9B) with attachment fibrils. Fibrils are visible stretching between the  
353 flattened interfilament grains on adjacent cells (Fig. 9C).

354

355 Hypothallial cell walls at 200-500 nm wide are much thinner than perithallial cell walls  
356 (Fig. 10 A-C). The HCW internal structure appears roughly radial (Fig. 10 A- C). But, the  
357 radial structure is not always well developed with parts of the HCW exhibiting a distinct  
358 break down the middle of the radial structures (Fig. 10C). There are fibrils parallel to the  
359 cell wall appearing to go through the wall grains similarly to the perithallial cell walls.

360 Interfilament grains are present, as in perithallial cells (Fig. 10B, C). The HCW wall can  
361 have two clearly defined morphologies (Fig. 10C). The wall adjacent to the interfilament  
362 is narrowest at ~200 nm, has closely spaced organic fibrils and is poorly calcified  
363 compared to the inner part of the wall (300-400 nm wide) and appears more like a  
364 mineralized membrane. The wider inner part of the cell wall has radial grains but without

Rob Nash 8/9/17 12:52 PM

Deleted:



366 the well-defined shape of the PCW radial grains. Similar to the perithallial cell walls,  
367 there are fibrils appearing to thread through the hypothallial cell wall grains.

368

369 The transitional cells between the hypothallus and perithallus have features from both  
370 types present (Fig. 10D). The cell walls can be narrow, <200 nm, poorly mineralized  
371 similarly to the outer part of the hypothallial cell wall. Parts of the cell wall resemble the  
372 perithallial cell walls, with radial grains and wall width of nearly 1 micron, although  
373 along the same wall this changes to ~200 nm wide and a poorly mineralized membrane.  
374 The parallel fibrils are also present within the transitional cell walls. Interfilament grains  
375 are present comparably to those between hypothallial and perithallial cells.

376

### 377 **Discussion**

#### 378 *Site temperature, ecology and growth*

379 The site of collection for this specimen (Fig. 1A) is a pavement of coralline encrusted,  
380 roughly flat to ovoid shells and pebbles often with dish shapes. Many, such as the  
381 specimen employed in this study have a concave surface (due to the original mollusk  
382 shape). The benthic surface that we show in figure 1B, is likely quite stable with time in  
383 the moderate reversing tidal current environment of the site. The conceptacles of *L. leave*,  
384 requiring considerable solar energy for construction; all appear on the upper side of the  
385 specimen and further assist our determination of orientation. Since the sea ice does not  
386 clear the area until late June or early July, solar energy has already peaked, by the time  
387 the benthos at 15-17 m receives significant light. Effectively, the growing season is July  
388 through November, and with a mean growing season temperature of < 2° C. Based on the

Rob Nash 8/9/17 1:05 PM

Deleted: B

390 lateral growth rates (5-7  $\mu\text{m}/\text{day}$ ) found by Adey (1970), a season of lateral growth would  
391 provide less than one mm of extension. As we discuss below, the vertical growth in this  
392 species is slower than the lateral growth. The layering seen in figure 2B likely represents  
393 4-5 years of vertical growth. At 80-100  $\mu\text{m}$  of perithallial addition/year, this relates well  
394 to the 100-200  $\mu\text{m}$  /year found with extensive data in the same region for  
395 *Clathromorphum compactum* (Adey et al. 2015b).

396

397 Considering that *Leptophytum leave* crusts can be many cm broad and rarely exceed 500  
398  $\mu\text{m}$  in thickness, except by overgrowing of earlier crusts, it can be assumed that after  
399 initial formation, upwards perithallial growth is either very slow, perhaps limited by the  
400 development of conceptacles for which considerable photosynthate must be dedicated. *L.*  
401 *leave* is a deep water species (Adey 1966a, b, 1968, 1971) and requires little solar energy  
402 to grow and carry out its life cycle; however, as shown by Adey (1970), the rate of  
403 hypothallial extension falls with light reduction, and it would be expected that growth on  
404 the underside of a shell-encased fragment would be present but less than that on the upper  
405 surface.

406

#### 407 *Temperature and magnesium*

408 One of the challenges using samples collected at a single point in time is that the growth  
409 history cannot always be precisely tied to previous points in time and temperature. As  
410 discussed in the previous section, this crust likely represents 4-5 years of growth. Thus  
411 the XRD mol%  $\text{MgCO}_3$  is an average for that period. The individual EDS measurement

Rob Nash 8/9/17 1:06 PM

Deleted: 1

413 spots cannot be tied to a particular time of year or temperature. However, the annual  
414 temperature range is not large, estimated to be ~ 4 °C across the growing season.  
415  
416 The XRD Mg content is within the range for average winter and summer Mg contents for  
417 *Clathromorphum compactum* collected from Arctic Bay, Kingitok and Quirpon (Halfar et  
418 al. 2011, 2013). The EDS-determined average Mg content for each carbonate type had a  
419 range of 7.6 mol% MgCO<sub>3</sub>, from 9.1 (*K. epilaeve* interfilament) to 16.7 mol% MgCO<sub>3</sub> (*L.*  
420 *laeve* upper crust hypothallus). The *L. laeve* upper hypothallus has 84% more Mg than  
421 the *K. epilaeve* interfilament. Although the exact time and temperature of formation for  
422 each component is not known, the temperature range (~4 °C) alone is highly unlikely to  
423 explain the Mg difference. Studies on Mg content in CCA for temperature proxies have  
424 used regressions with temperature records to determine a range of responses from 0.266  
425 mol % (Williamson et al. 2014), ~1.0 (Halfar et al. 2000; Darrenougue et al. 2013) to  
426 1.76 mol% MgCO<sub>3</sub> (Kamenos et al. 2008) per degree celsius of temperature increase.  
427 Only the Kamenos et al. (2008) calibration is close to explaining the range here.  
428 However, that calibration was for branches of the rhodolith *Lithothamnion glaciale*.  
429 Using temperature calibrations for crust CCA in experimental treatments, where  
430 temperature was the only condition changed (Diaz-Pulido et al. 2014; Nash et al. 2016), a  
431 calibration of 0.33 mol%/°C is obtained. This rate is in agreement with results from  
432 Williamson et al. (2014), Chave and Wheeler (1964) and Adey (1965). Using 0.33, a shift  
433 of 7.6 mol% equates to 23°C of change, nearly four times greater than the maximum  
434 annual range at this site. The magnesium offsets in different parts of the crust are clearly  
435 aligned to anatomical features and not controlled by temperature. This proposal is

Rob Nash 8/6/17 8:26 PM

Moved (insertion) [1]

Rob Nash 8/6/17 8:26 PM

Deleted: is

437 | [supported by recent results for species of CCA \*Phymatolithon\* that also demonstrated](#)  
438 | [anomalously higher Mg in hypothallial cells across four species collected from differing](#)  
439 | [locations \(Nash and Adey 2017\).](#) Within these offsets there may still be a response to  
440 | temperature over the seasons, but it was beyond the capacity of this study to investigate  
441 | seasonal changes. It is noteworthy that the upper crust hypothallus average of 16.7 mol%  
442 | MgCO<sub>3</sub> is equivalent to new surface crust of tropical *Porolithon onkodes* grown at 30° C  
443 | (Diaz Pulido et al. 2014).

444

#### 445 | *Structural features*

446 | There are three main types of calcified structures within the vegetative tissues of  
447 | *Leptophytum leave* and *Kvaleya epilaeve*: (1) the radial Mg-calcite within the cell walls  
448 | of the perithallium, (2) the interfilament in both the perithallium and hypothallium and  
449 | (3) the thin hypothallial cell walls. Each has distinctively different features and  
450 | magnesium content. The more elongate (and thinner-walled) cells of the hypothallus have  
451 | been reported for other species of Melobesioideae (Adey 1964, 1965, 1966a). However,  
452 | this is the first study to show that the internal cell wall Mg-calcite structure and their  
453 | magnesium content differs from perithallial cell wall. Probably these thinner elongated  
454 | hypothallial cell walls are a result of relatively rapid growth during lateral extension.  
455 | There are numerous examples documenting higher Mg in parts of crusts that have grown  
456 | faster during the warmer seasons (e.g. *Clathromorphum compactum* and *C. nereostratum*  
457 | by Adey et al. 2013). In this case there is no elevated temperature. The mechanistic  
458 | process by which more Mg is incorporated into the HCW and how this relates to growth  
459 | rate is not known. [The \*K. epilaeve\* perithallial cells had lower Mg than the \*L. leave\*](#)

460 perithallial cells. Cabioch and Giraud (1986) described the *perithallial* cells as being a  
461 later stage of development than *epithallial* cells. Epithallial cells do not have fully  
462 developed rounded cell walls of the perithallial cells (Adey 2015a, b). Although Mg-  
463 content of epithallial carbonate is lower than the perithallial values (Diaz-Pulido et al.  
464 2014, Nash et al. 2015, 2016), the lower Mg measured here is not considered a result of  
465 different cell type as the *K. epilaeve* cell walls have the radial calcite similarly to the  
466 perithallial *L. Leave*, indicating that these are similarly well developed. Considering the  
467 time of collection in early summer, it is quite possible that the *K. epilaeve* growth closest  
468 to the *L. leave* surface was laid down closer to winter and in cooler temperatures, this  
469 being a likely explanation for the lower Mg content.

470

471

#### 472 *Calcification and photosynthesis*

473 The parasitic epiphyte *K. epilaeve* is not known to photosynthesize. The similarity of cell  
474 wall and interfilament features to those of the photosynthesizing host, *L. leave*, suggests  
475 that the precipitation of the Mg-calcite is not directly driven by photosynthesis as has  
476 been suggested for coralline algae (Ries 2010) and demonstrated for calcifying green  
477 algae *Halimeda*, (e.g. Adey 1998, Sinutok et al. 2012). Rather, considering also the  
478 evidence for continued calcification during the Arctic winter (Halfar et al. 2011, Adey et  
479 al. 2013), it seems likely the first control is the provision of the organic substrate that  
480 subsequently either becomes calcified or induces calcification. This does not negate the  
481 possibility of increased calcification as photosynthetic rates increase (e.g. Borowitzka  
482 1981).

483 *Banding and magnesium uptake*

484 The concentric banding of organic fibrils within the perithallial cell wall is interesting  
485 from a magnesium perspective. The dominant visual morphological pattern is the radial  
486 Mg-calcite crystals. In contrast, other work indicates the dominant pattern of Mg  
487 distribution within the cell may be unrelated to the radial features. Concentric zonations  
488 of higher Mg content have been shown, using back scatter electron imaging, in cell walls  
489 of tropical *Porolithon onkodes* (Nash et al. 2011). Ragazzola et al. (2016) using  
490 NanoSIMs, also showed clear concentric banding of Mg within summer cell walls of  
491 *Lithothamnion glaciale*. These published observations together with the results in this  
492 study suggest there could be a strong organic control on Mg distribution within the cell,  
493 with this being related to the concentric fibrils. Possibly the fibril organics enable higher  
494 Mg incorporation than the organics involved in the radial structures. Ragazzola et al.  
495 (2016) further documented a decreased prominence of Mg banding in winter cells of *L.*  
496 *glaciale* and for those grown in CO<sub>2</sub> enriched conditions. Results from our study offer an  
497 insight as to possible temperature or CO<sub>2</sub>-driven ultrastructure changes that may result in  
498 decreased Mg content. If the banded fibrils observed in this study are normally similarly  
499 present in the *L. glaciale*, then an absence of the Mg bands for their winter and elevated  
500 CO<sub>2</sub> treatment suggests that these fibrils could either be absent, or the organic structure or  
501 composition has changed and no longer enables elevated Mg.

502

503 *Relevance to Climate Archiving*

504 This study has several implications for climate archiving using corallines. Most  
505 importantly, anatomical controls can override temperature influences on Mg composition.

506 We do not suggest current studies are inadequate because the finer scale (submicron)  
507 scale variations are not captured. These fine scale variations will not change the general  
508 trends or conclusions. Rather, we suggest caution regarding interpretation of data where a  
509 change in Mg is visibly associated with a change in cell type as temperature may not be  
510 the only possible driver of Mg change. While hypothallial areas can usually be easily  
511 excluded from most climate archiving (but see Bougeois et al. 2015), less obvious  
512 anatomically different tissues such as the elevated Mg transitional cell walls may not be  
513 noticeable at low magnification. This may lead to a false positive result identifying such a  
514 region as reflecting a time of higher temperature. As well as these tissue-scale differences,  
515 the cellular scale differences may also need to be considered. Any seasonal change in  
516 relative proportion of CW to IF can shift the [Mg] in absence of any temperature-  
517 influenced change. For example if CW = 10 mol% MgCO<sub>3</sub> and IF = 8 mol% MgCO<sub>3</sub>,  
518 and crust changes from 90:10 CW:IF to 50:50 this would equate to a change in of 9.8 to 9  
519 mol% for measurements of bulk crust (i.e. spot sizes larger than the cell size, or smaller  
520 spot sizes averaged without reference to their anatomical placement). This change  
521 equates to a 2-3 degrees using a temperature calibration of 0.33 mol% MgCO<sub>3</sub> °C. Should  
522 the difference in cell wall and interfilament mol% MgCO<sub>3</sub> be larger, then the total  
523 average will change more substantially. Furthermore, the bulk magnesium results for  
524 different CCA species with differing proportions of cell wall:interfilament from the same  
525 temperature environments will have a range of non-temperature related Mg content that is  
526 controlled by the cell wall:interfilament. This change in structure, if seasonally correlated,  
527 will be indirectly related to temperature, but there may be other influences such as light.

Rob Nash 8/13/17 5:25 PM

**Deleted:** Thus, any study of CCA for temperature archiving must take into account changes in anatomy throughout the measured areas.

532 Thus, the best CCA temperature climate archives, as compared to seasonal archives, are  
533 likely to be those with the least seasonally varying ultrastructure changes.

534

535 Understanding the combined contribution of anatomical and temperature changes to  
536 measured magnesium may help explain the variation of Mg-temperature calibrations in  
537 the published literature. Typically it is the rhodoliths that show the highest response of  
538 Mg to temperature, e.g. *Lithothamnion glaciale* at 1- 1.76 mol% MgCO<sub>3</sub> (Halfar et al.  
539 2000; Kamenos et al. 2008) per degree celsius of temperature increase compared to  
540 *Clathromorphum compactum* at 0.7 mol% MgCO<sub>3</sub> (Halfar et al. 2010). The *L. glaciale*  
541 has distinct seasonal changes shifting to a clear band of elongated cells during summer.  
542 The rhodolith summer cells have similarities in appearance to the hypothallial cells in this  
543 study. Possibly the higher measured Mg in the long cells of the rhodolith is a result in  
544 part of a switch towards a more perithallial style cell and may not be entirely temperature  
545 related. This proposition is supported by Sletten et al. (2017) who found a switch to  
546 elongated cells with higher Mg that was unrelated to seasonality. In contrast, anatomical  
547 changes in *C. compactum* (Adey et al. 2013) are not so extreme.

548

549 *Suggestions for improving analytical methods*

550 Our work is ongoing in this area of research and as more species and ultrastructure are  
551 studied we expect to be able to provide more detailed guidance on utilizing Mg from  
552 CCA for climate proxies. However, in the interim, there are several steps that could be  
553 incorporated into routine analyses to improve the accuracy of Mg climate proxies. Firstly,  
554 it should become a routine part of analyses that the ultrastructure is assessed to determine



555 if the ratio of cell wall to interfilament carbonate changes regularly with seasons. Second,  
556 when possible as well as the larger spot sizes used in sampling transects, e.g. 10-20  
557 microns, make discrete spot analyses using the smallest reliable interaction volume  
558 possible to determine indicative Mg offsets between the cell wall and interfilament so  
559 that this can be adjusted for if necessary, in the final interpretation. Third, ensure that  
560 hypothallial growth is not included in sampling transects. Usually the basal hypothallus is  
561 easily avoided, but secondary hypothallus and transitional cells may be harder to avoid  
562 without careful SEM analysis.

563

#### 564 **Conclusion**

565 It appears that within these CCA, there is a strong control on the uptake of Mg in relation  
566 to the different anatomical components. This is in contrast to the suggestion by Ries  
567 (2010), based on Mg:Ca in seawater manipulation experiments, that corallines exert little  
568 or no control over their Mg uptake other than to specify the polymorph. Recent work  
569 indicates that the interfilament and perithallial carbonate react similarly to temperature,  
570 but the responsive hypothallial carbonate is inconclusive (Nash and Adey 2017). It would  
571 be interesting to identify if each of interfilament, perithallial and hypothallial cell walls  
572 reacted similarly to changes in seawater Mg:Ca, or if there were differences in anatomical  
573 controls. Crucially, it is necessary to keep in mind the biological controls on Mg uptake  
574 when using CCA Mg changes as a climate proxy.

575

576 While the focus of this study has been the distribution of Mg with different anatomical  
577 features, the high-magnification images are the first to show the cellular-scale organic

Rob Nash 8/13/17 8:04 PM

Deleted: temperature and

579 structures together with the carbonate components. The orientation of the crystals in the  
580 interfilament and the cell walls are in agreement with lower-magnification SEM studies  
581 on a range of algal species (Cabioch and Giraud 1986, Adey et al. 2013). The  
582 combination of gentle etching and high-magnification SEM has revealed previously  
583 unknown features such as the fibrils threading through the radial Mg-calcite (Fig. 7C).  
584 Further, showing that the Mg content varies with anatomical features suggests that the  
585 calcification may be a different process, or have different controls, for each carbonate  
586 type. This adds an extra level of complexity when considering how environmental  
587 changes, such as increasing temperature, may impact on the capacity of the CCA to  
588 continue their important substrate provision ecological role.

589

#### 590 **Acknowledgments**

591 Thanks to the Centre for Advanced Microscopy at the Australian National University and  
592 the Mineral Sciences department at the Smithsonian Institution for assistance with SEM-  
593 EDS.

594

#### 595 **References**

- 596 Adey, W. 1964. The Genus *Phymatolithon* in the Gulf of Maine. *Hydrobiologia*  
597 24:377-420.
- 598 Adey, W. 1965. The Genus *Clathromorphum* in the Gulf of Maine. *Hydrobiologia*  
599 26:539-573.
- 600 Adey, W. 1966a. The Genera *Lithothamnium*, *Leptophytum* (nov. gen.) and  
601 *Phymatolithon* in the Gulf of Maine. *Hydrobiologia* 28:321-368.

602 Adey, W. 1966b. The Genus *Pseudolithophyllum* in the Gulf of Maine.  
603 *Hydrobiologia* 27:479-597.

604 Adey, W. 1966c. The Distribution of Saxicolous Crustose Corallines in the  
605 Northwestern North Atlantic. *J. Phycol.* 2:49-54.

606 Adey, W. 1970. The Effects of Light and Temperature on Growth Rates in  
607 Boreal-Subarctic Crustose Corallines. *J. Phycol.* 6:269-276.

608 Adey, W. 1973. Temperature Control of Reproduction and Productivity in a  
609 Subarctic Coralline Alga. *Phycologia* 12:111-118.

610 Adey, W. 1978a. Coral Reef Morphogenesis: A Multidimensional Model.  
611 *Science* 202:831-837.

612 Adey, W. 1978b. Algal Ridges of the Caribbean Sea and West Indies. *Phycologia*  
613 17:361-367.

614 Adey, W. 1998. Coral Reefs: algal structured and mediated ecosystems in shallow,  
615 turbulent alkaline seas. *J. Phycol.* 34:393-406.

616 Adey, W. & D. McKibbin. 1970. Studies of the Maerl Species of the Ria de Vigo.  
617 *Bot. Mar.* 8:100-106.

618 Adey, W. & C. Sperapani. 1971. The Biology of *Kvaleya epilaeve*, A New  
619 Parasitic Genus and Species of Corallinaceae. *Phycologia* 10:29-42.

620 Adey, W., T. Masaki & H. Akioka. 1974. *Ezo epiyessoense*, A New Parasitic Genus and  
621 species of Corallinaceae. *Phycologia* 13:329-344.

622 Adey, W. & J. M. Vassar. 1975. Colonization, Succession and Growth Rates of  
623 Caribbean Crustose Corallines. *Phycologia* 14:55-69.

624 Adey, W., Y. Chamberlain, & L. Irvine. 2005. A SEM-Based Analysis of the  
625 Morphology, reproduction and ecology of *Lithothamnion tophiforme* Unger  
626 (Corallinales, Rhodophyta), an Arctic coralline. *J. Phycol.* 41:1010-1024.

627 Adey, W., Lindstrom, S., Hommersand M. & Muller, K. 2008. The biogeographic origin  
628 of Arctic endemic seaweeds: A thermogeographic view. *J. Phycol.* 44:1384-1394.

629 Adey, W., Halfar, J. & Williams, B. 2013. The coralline genus *Clathromorphum* Foslie  
630 emend Adey; biological, physiological and ecological factors controlling  
631 carbonate production in an Arctic/Subarctic climate archive. *Smithsonian*  
632 *Contributions to the Marine Sciences* 40:1-83.

633 Adey, W., Hernandez-Kantun, J. J., Johnson, G. & Gabrielson, P. 2015a. DNA  
634 sequencing, anatomy and calcification patterns support a monophyletic, Subarctic,  
635 carbonate reef-forming *Clathromorphum* (Hapalidiaceae, Corallinales,  
636 Rhodophyta). *J. Phycol.* 51:189-203.

637 Adey, W., Halfar, J., Humphreys, A. Belanger, D., Gagnon, P. & Fox, M. 2015b.  
638 Subarctic rhodolith beds promote longevity of crustose coralline algal buildups  
639 and their climate archiving potential. *Palaios* 30:281-293.

640 Amado-Filho, G., Moura, R., Bastos, A., Salgado, L., Sumida, P., Guth, A., Francini-  
641 Filho, R., Pereira-Filho, G., Abrantes, D., Brasileiro, P., Bahia, R., Leal, R.,  
642 Kaufman, L., Kleypas, J., Farina, M. & Thompson, F. 2012. Rhodolith Beds are  
643 major CaCO<sub>3</sub> bio-factories in the Tropical South West Atlantic. *Plos One* 7  
644 (4):e35171.

645 Bahia, R., Abrantes, D., Brasileiro, P., Pereira-Filho, G. & Amado-Filho, G. 2010.  
646 Rhodolith bed structure along a depth gradient on the northern coast of Bahia  
647 State, Brazil. *Brazilian J. Oceanography* 58:323–337.

648 Barnes, D. J., & Lough, J. M. 1993. On the nature and causes of density banding in  
649 massive coral skeletons. *J. Exp. Mar. Biol. Ecol.* 167:91-108.

650 Bentov, S., & Erez, J. 2005. Novel observations on biomineralization processes in  
651 foraminifera and implications for Mg/Ca ratio in the shells. *Geology* 33:841-844.

652 Borowitzka, M. A. 1981. Photosynthesis and Calcification in the Articulated Coralline  
653 Red Algae *Amphiroa anceps* and *A. foliacea*. *Mar. Biol.* 62:17-23.

654 Bougeois, L., Williams, B., Halfar, J., Konar, B., Adey, W., Kronz, A. & Wortmann, U.G.  
655 2015. Does the coralline alga *Leptophytum fæcundum* (Kjellman) capture  
656 paleoenvironmental variability in the Arctic Ocean? *Arctic, Antarctic, and Alpine*  
657 *Research* 47:375-387.

658 Chave, K. & B. Wheeler. 1965 Mineralogical changes during growth in the red alga  
659 *Clathromorphum compactum*. *Science* 147:621.

660 Darrenouge, N., De Deckker, P., Payri, C., Eggins, S., & Fallon, S. 2013. Growth and  
661 chronology of the rhodolith-forming, coralline red alga *Sporolithon*  
662 *durum*. *Marine Ecology Progress Series* 474:105-119.

663 [Diaz-Pulido, G., Nash, M.C., Anthony, K.R., Bender, D., Opdyke, B.N., Reyes-Nivia, C.](#)  
664 [& Troitzsch, U., 2014. Greenhouse conditions induce mineralogical changes and](#)  
665 [dolomite accumulation in coralline algae on tropical reefs. \*Nature\*](#)  
666 [communications, 5.](#)

667

668 Esau, K. 1953. *Plant Anatomy*. John Wiley and Sons. New York. 735 pp.

669 Nash, M. C., Opdyke, B. N., Troitzsch, U., Russell, B. D., Adey, W. H., Kato, A., Diaz-  
670 Pulido G., et al. 2013. Dolomite-rich coralline algae in reefs resist dissolution in  
671 acidified conditions. *Nat. Clim. Change* 3:268-272.

672 Halfar, J., Zack, T., Kronz, A., & Zachos, J. C. 2000. Growth and high-resolution  
673 paleoenvironmental signals of rhodoliths (coralline red algae)- A new biogenic  
674 archive. *J. Geophysical Research* 105:22-107.

675 Gamboa, G., Halfar, J., Hetzinger, S., Adey, W., Zack, T., B. Kunz, B., & Jacob, D. 2010.  
676 Mg/Ca ratios in coralline algae as proxies for NW Atlantic temperature variations.  
677 *J. Geophysical Research-Oceans* 115:1-12.

678 Halfar, J., Hetzinger, S., Adey, W., Zack, T., Gamboa, G., Kunz, B., Williams, B., Jacob,  
679 D. 2010. Coralline algal growth increment widths archive North Atlantic climate  
680 variability. *Palaeogeography, Palaeoclimatology, Palaeoecology* 302:71-80

681 Halfar, J., Adey, W., Kronz, A., Edinger, E., & W. Fitzhugh, W. 2013. Unprecedented  
682 sea-ice decline archived by novel multi-century annual-resolution algal proxy.  
683 *PNAS* 110: 197837-19741.

684 Harvey, A. S., Harvey, R. M., & Merton, E. 2016. The distribution, significance and  
685 vulnerability of Australian rhodolith beds: a review. *Marine and Freshwater*  
686 *Research* doi.org/10.1071/MF15434.

687 Hetzinger, S., Halfar, J., Kronz, A., Steneck, R.S., Adey, W., Lebednik, P. A. & Schone,  
688 B. R. 2009. High-Resolution Mg/Ca Ratios in a coralline Red Alga As a Proxy  
689 for Bering Sea Temperature Variations from 1902-1967. *Palaios* 24:406-412.

690 Kamenos, N., Cusack, M., & Moore, P. G. 2008. Coralline Algae Are Global  
691 Paleothermometers with Bi-Weekly Resolution. *Geochimica et Cosmochimica*  
692 *Acta* 72:771–779.

693 Kamenos, N. A., & Law, A. 2010. Temperature controls on coralline algal skeletal  
694 growth. *J. Phycol.* 46:331-335.

695 Krayesky-Self, S., Richards, J., Rahmatian M., & Fredericq, S. 2016. Aragonite infill in  
696 overgrown conceptacles of coralline Lithothamnion spp (Hapalidaceae,  
697 Hapalidiales, Rhodophyta): new insights in biomineralization and  
698 phylominerology. *J. Phycol.* 52:161-173.

699 Martin, C. S., Giannoulaki, M., De Leo, F., Scardi, M., Salomidi, M., Knittweis, L., Pace,  
700 M. L. et al. 2014. Coralligenous and maërl habitats: predictive modelling to  
701 identify their spatial distributions across the Mediterranean Sea. *Sci. Rep.* 4.

702 McCoy, S. J., & Kamenos, N. A. 2015. Coralline algae (Rhodophyta) in a changing  
703 world: integrating ecological, physiological, and geochemical responses to global  
704 change. *J. Phycol.* 51:6-24.

705 [Nash, M.C. & Adey, W., 2017. Multiple phases of Mg-calcite in crustose coralline algae](#)  
706 [suggest caution for temperature proxy and ocean acidification assessment: lessons](#)  
707 [from the ultrastructure and biomineralisation in Phymatolithon \(Rhodophyta,](#)  
708 [Corallinales\). \*J. Phycol.\* In press. 10.1111/jpy.12559](#)

709 Nash, M. C., Troitzsch, U., Opdyke, B., Trafford, J., Russell, B., & Kline, D. 2011. First  
710 discovery of dolomite and magnesite in living coralline algae and its  
711 geobiological implications. *Biogeosciences*. 8, 3331-3340.

712 Nash, M. C., Opdyke, B. N., Wu, Z., Xu, H. & Trafford J. M. 2013. Simple X-ray  
713 diffraction techniques to identify Mg calcite, dolomite, and magnesite in tropical  
714 coralline algae and assess peak asymmetry. *J. Sed. Res.* 83:1085-1099.

715 Nash, M. C., Uthicke, S., Negri, A.P., & Cantin, N. E. 2015. Ocean acidification does not  
716 affect magnesium composition or dolomite formation in living crustose coralline  
717 algae, *Porolithon onkodes* in an experimental system. *Biogeosciences* 12:5247-  
718 5260.

719 Nash M.C., Martin S., Gattuso J-P. 2016. Mineralogical response of the Mediterranean  
720 crustose coralline alga *Lithophyllum cabiochae* to near-future ocean acidification  
721 and warming. *Biogeosciences Discussions* doi:10.5194/bg-2016-160.

722 [Ragazzola, F., Foster, L. C., Jones, C. J., Scott, T. B., Fietzke, J., Kilburn, M. R., &](#)  
723 [Schmidt, D. N. 2016. Impact of high CO<sub>2</sub> on the geochemistry of the coralline](#)  
724 [algae \*Lithothamnion glaciale\*. \*Scientific reports\*, 6, 20572.](#)

725 Ries, J. 2010. Review: Geological and Experimental Evidence for Secular Variation in  
726 Seawater Mg/Ca (Calcite-Aragonite Seas) and Its Effects on Marine Biological  
727 Calcification. *Biogeosciences*, 7:2795–2849.

728 [Sletten, H. R., Andrus, C. F. T., Guzmán, H. M., & Halfar, J. 2017. Re-evaluation of](#)  
729 [using rhodolith growth patterns for paleoenvironmental reconstruction: An](#)  
730 [example from the Gulf of Panama. \*Palaeogeography, Palaeoclimatology,\*](#)  
731 [Palaeoecology](#) 465:264-277.

732 Sinutok, S., Hill, R., Doblin, M. A., Kühl, M., & Ralph, P. J. 2012. Microenvironmental  
733 changes support evidence of photosynthesis and calcification inhibition in  
734 *Halimeda* under ocean acidification and warming. *Coral Reefs* 31:1201-1213.



735 Sherman, C.E., Fletcher, C., Rubin, K., Simmons, K. & Adey, W. 2014. Sea-level and  
 736 reef accretion history of Marine Oxygen Isotope Stage 7 and late stage 5 based on  
 737 age and facies of submerged late Pleistocene reefs, Oahu, Hawaii. *Quaternary Res.*  
 738 81:138-150.

739 [Vásquez-Elizondo, R.M. and Enriquez, S., 2016. Coralline algal physiology is more](#)  
 740 [adversely affected by elevated temperature than reduced pH. \*Scientific reports\*, 6,](#)  
 741 [p.19030.](#)

742 Wanamaker, A., Kreutz, K., Schone, B., Pettigrew, N., Borns, H., Introne, D., Belknap,  
 743 D., Maasch, K. & Feindel, S. 2008. Coupled North Atlantic slope water forcing  
 744 on Gulf of Maine temperatures over the past millennium. *Climate Dynamics*  
 745 31:183-194.

746 Williamson, C. J., Najorka, J., Perkins, R., M. L. Yallop, M. L. & Brodie, J. 2014.  
 747 Skeletal mineralogy of geniculate corallines: providing context for climate change  
 748 and ocean acidification research. *Marine ecology progress series* 513:71-84.

749  
 750 **Tables**

|                              | <i>K. epilaeve</i> |       | <i>L. laeve</i> |          |          |            |                |            |
|------------------------------|--------------------|-------|-----------------|----------|----------|------------|----------------|------------|
|                              | IF                 | CW    | CW Under        | CW Upper | CW comb. | Under Hyp. | Upper transit. | Upper Hyp. |
| <b>mol% MgCO<sub>3</sub></b> | 9.1%               | 10.1% | 11.2%           | 12.9%    | 12.2%    | 12.3%      | 15.6%          | 16.7%      |
| <b>St. Dev.</b>              | 1.0%               | 1.2%  | 1.2%            | 2.5%     | 2.2%     | 0.7%       | 1.7%           | 1.7%       |
| <b>Mg/Ca</b>                 | 0.100              | 0.113 | 0.126           | 0.149    | 0.138    | 0.140      | 0.185          | 0.200      |

751 **Table 1: SEM-EDS results. Conversion of mol% to Mg/Ca is included.**

|                    | Average mol% and n | <i>K. epilaeve</i> IF | <i>K. epilaeve</i> CW | <i>L. laeve</i> under CW | <i>L. laeve</i> upper CW | <i>L. laeve</i> CW both | <i>L. laeve</i> under Hyp. | <i>L. laeve</i> upper Hyp. |
|--------------------|--------------------|-----------------------|-----------------------|--------------------------|--------------------------|-------------------------|----------------------------|----------------------------|
| <i>K. epilaeve</i> | 9.1 %              |                       |                       |                          |                          |                         |                            |                            |

|                                 |               |              |       |              |       |                  |                  |       |
|---------------------------------|---------------|--------------|-------|--------------|-------|------------------|------------------|-------|
| IF                              | n=9           |              |       |              |       |                  |                  |       |
| <i>K. epilaeve</i><br>CW        | 10.1%<br>n=8  | <b>0.069</b> |       |              |       |                  |                  |       |
| <i>L. laeve</i><br>under CW     | 11.2%<br>n=8  |              | 0.129 |              |       |                  |                  |       |
| <i>L. laeve</i><br>upper CW     | 12.9%<br>n=9  | <b>0.012</b> | 0.112 |              |       |                  |                  |       |
| <i>L. laeve</i> CW<br>both      | 12.2%<br>n=17 | <b>0.024</b> |       |              |       |                  |                  |       |
| <i>L. laeve</i><br>under Hyp.   | 12.3%<br>n=8  |              |       | <b>0.052</b> | 0.470 | 0.914            |                  |       |
| <i>L. laeve</i><br>upper Hyp.   | 16.7%<br>n=8  |              |       |              |       | <b>&lt;0.001</b> | <b>&lt;0.001</b> |       |
| <i>L. laeve</i><br>upper trans. | 15.6%<br>n=8  |              |       |              |       | <b>&lt;0.001</b> | <b>&lt;0.001</b> | 0.259 |

752 **Table 2: T-test  $p$  values for 15 kV spot EDS.**

753

754 **Figures**

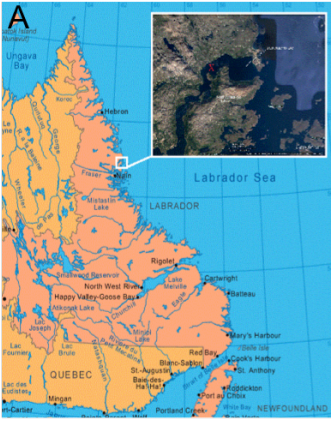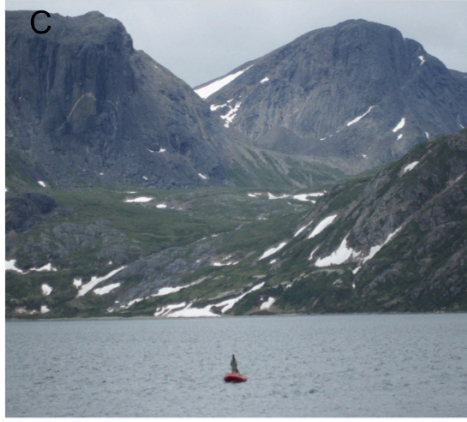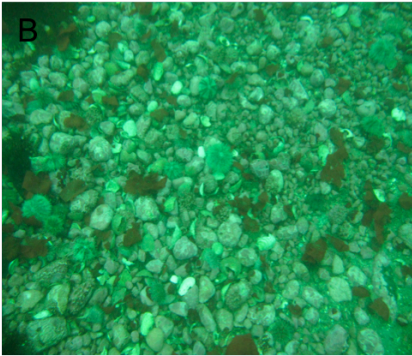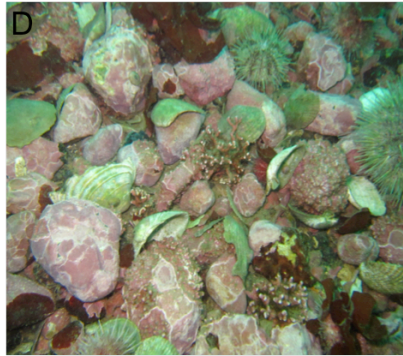

755

756

757

758

Figure 1: A. Port Manvers Bay Station, Labrador. B. Pebble/shell bottom with occasional rhodoliths at 15-17 m. Coralline covered pebbles range from about 5-10 cm diameter. C. Collecting site in western Port Manvers Bay. D. Close-up of bottom shown in figure 1C.

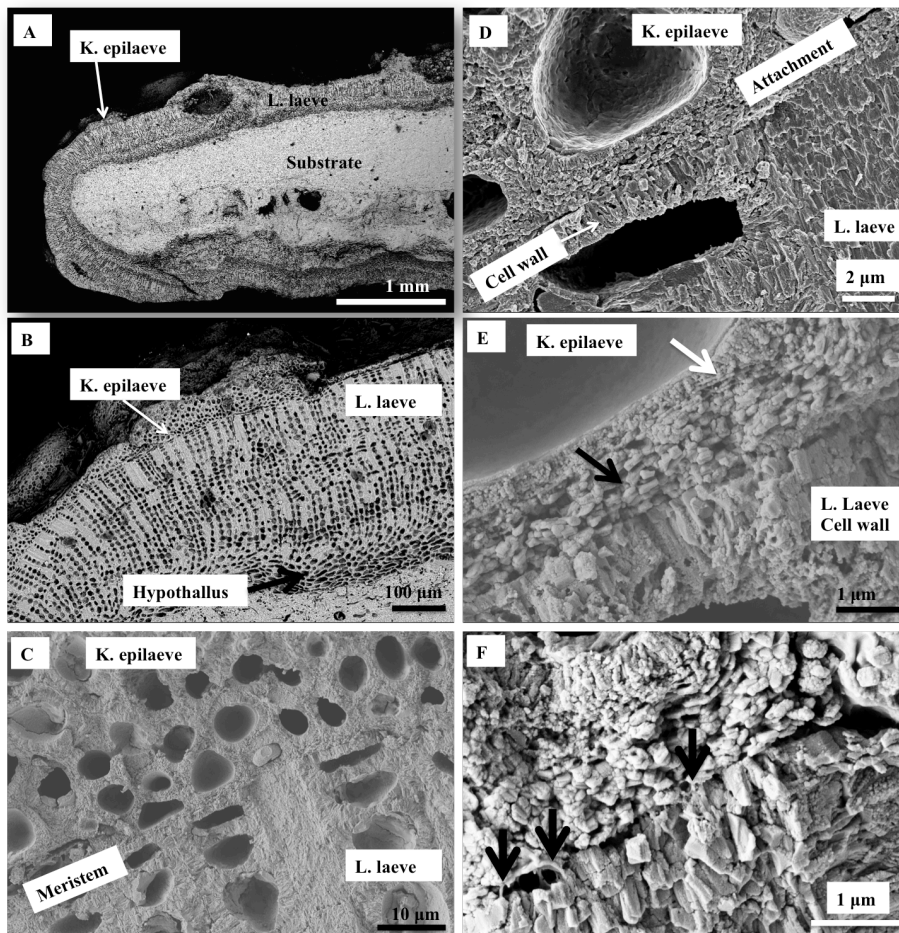

759

760 Figure 2: Overview of *K. epilaeve* on *L. laeve*. **A.** Overview (BSE). *L. laeve* has been partly overgrown by  
 761 *K. epilaeve*. **B.** Closer up (BSE) *K. epilaeve* has a very thin perithallium with thicker buildup for its  
 762 conceptacle. **C.** Close up (SE) and **D** showing attachment zone of *K. epilaeve* hypothallus on the meristem  
 763 of the *L. laeve*. **E.** (SE) The cell wall in the *L. laeve* is roughly radial whereas the *K. epilaeve* cell wall does  
 764 not appear properly mineralized with nm-scale beads of Mg-calcite along what appears to be organic fibrils  
 765 (white arrow). The *K. epilaeve* Mg-calcite layer at the attachment zone has coarse angular grains roughly  
 766 parallel to the *L. laeve* surface (black arrow). **F.** (SE) Organic fibrils are visible (black arrows) between the  
 767 base of the *K. epilaeve* and the surface of the *L. laeve* suggesting this is the attachment mechanism.

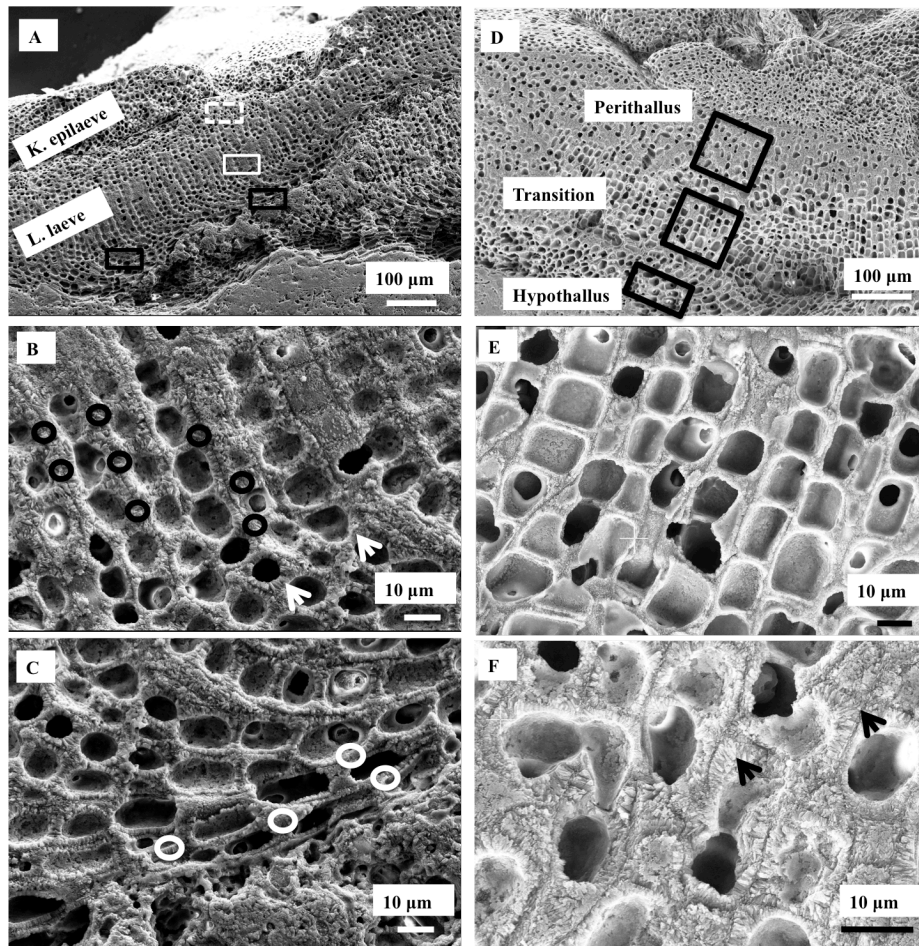

768

769 Figure 3: Overview of *L. laeve* and *K. epilaeve* and EDS sites in *L. laeve*. A-C. Sites on the underside of  
 770 the pebble. D-F. Sites on the upper side of the pebble. A. White dashed box- cell wall and interfilament in  
 771 *K. epilaeve*. White box- perithallial cell wall *L. laeve*. Black box- hypothallus *L. laeve*. B. EDS sites for  
 772 cell wall measurements of *L. laeve*. Circle size indicates approximate area of measurement (3 microns).  
 773 Cell wall radial Mg-calcite (arrowheads). C. EDS sites for hypothallus (right box in A). D. EDS sites on  
 774 sample upper side for *L. laeve*. E. *L. laeve*. F. *L. laeve*. Cell walls in upper side are visually comparable to  
 775 cell walls in underside with radial Mg-calcite (arrowheads) in cell walls and minimal interfilament.

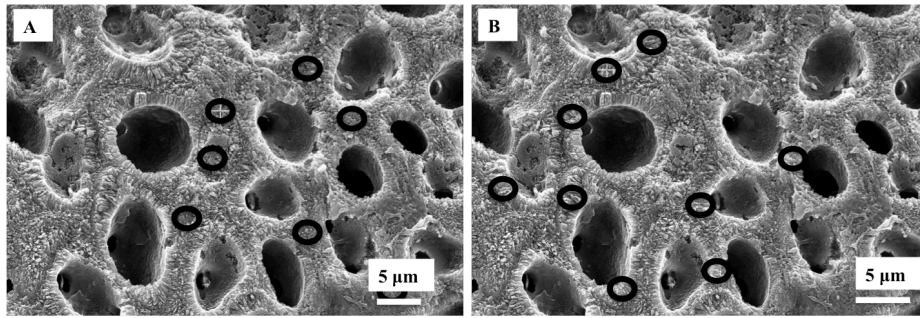

776

777 Figure 4: Detail of EDS in *K. epilaeve* (dashed white box in Fig. 2A) A. EDS sites for interfilament. B.

778 EDS sites for cell wall.

779

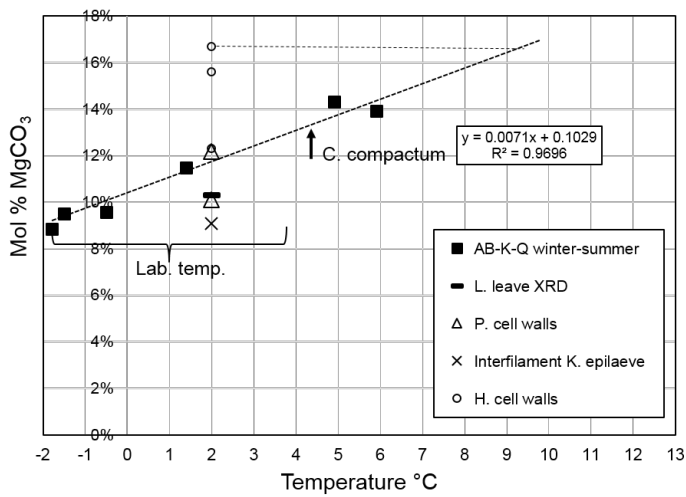

780

781 Figure 5: *L. Leave* and *K. epilaeve* Mg content relative to *Clathromorphum compactum* from Arctic Bay,

782 Kingitok and Quirpon (Halfar et al. 2010, 2013). Lab – Labrador sea. Heavy dashed line- best fit for *C.*

783 *compactum*. Light dashed line- indicates the temperature equivalent on the *C. compactum* line for the *L.*

784 *leave* hypothallial Mg-content.

785

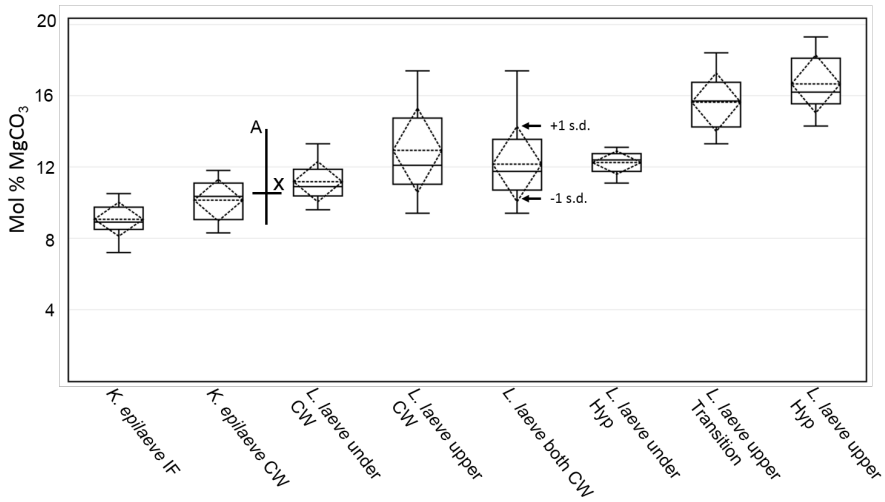

786

787 Figure 6: Box plot of EDS mol% MgCO<sub>3</sub> results. Box represents the 2<sup>nd</sup> and 3<sup>rd</sup> quartiles. The lower and  
 788 upper bars are the minimum and maximum values (excluding an outlier for *L. laeve* under cell wall). The  
 789 solid middle line within the box is the median value and the dash middle line the average. The dashed  
 790 diamond box represents one standard deviation. The drawn-on cross represents the XRD mol% (X) and the  
 791 seasonal range (A) of mol% for the Arctic Bay – Kingitok – Quirpon dataset in figure 5.

792

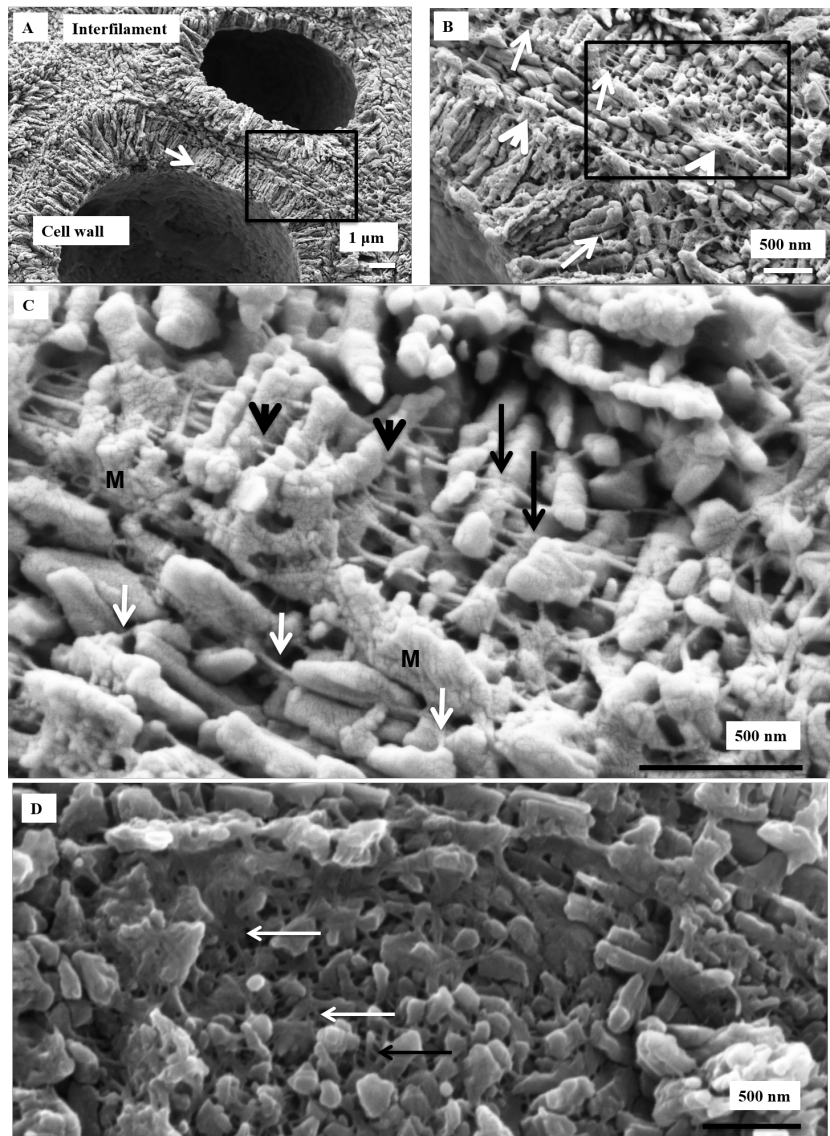

793

794 Figure 7: *K. epilaeve* cell wall structure. Crust polished and cleaned for 2 minutes. **A.** Cell walls have radial  
 795 Mg-calcite whereas the interfilament grains are orientated either parallel to the filament axis or randomly  
 796 within the corner junctions. Within the radial cell walls a secondary concentric banding pattern is visible  
 797 (white arrow). Black box enlarged in **B.** **B.** Organic fibrils, ~10nm wide, run parallel to cell wall edges



798 (black arrows). Fibrils are concentrated along the outer of the cell wall (white arrows). Black box enlarged  
799 in C. C. The cell wall fibrils appear to string through the centre of the radial grains (black arrowheads),  
800 Other fibrils drape over the grains (black arrows). Fibrils are present in the interfilament (white arrows). M  
801 – mineralized membrane. D. Plan view of cell wall grains. Organic fibrils form a dense mesh (white  
802 arrows).  
803

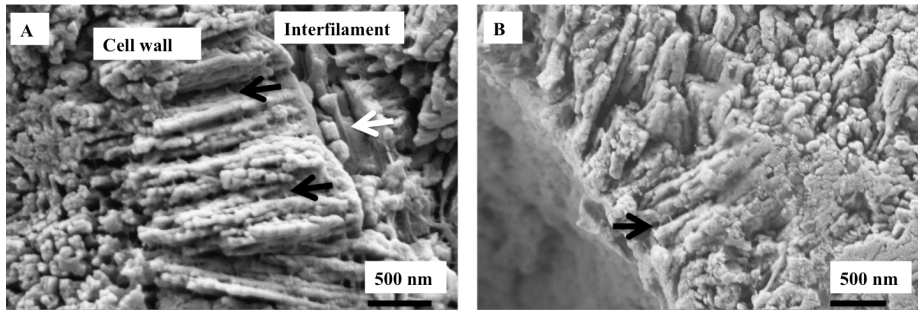

804  
805 Figure 8: *L. laeve* cell wall structure. A. Cleaned for 2 minutes. Cell wall radial crystals are 1.5 micron  
806 length cylindrical grains. Fibrils are present (black arrows) but not as easy to see as in the *K. epilaeve*.  
807 Interfilament grains parallel to cell wall with organic fibrils (white arrows) also running parallel to cell wall.  
808 B. Etched for 20 minutes. Fibrils appear similarly as in the *K. epilaeve* with the fence post-wire structure  
809 (black arrows).  
810

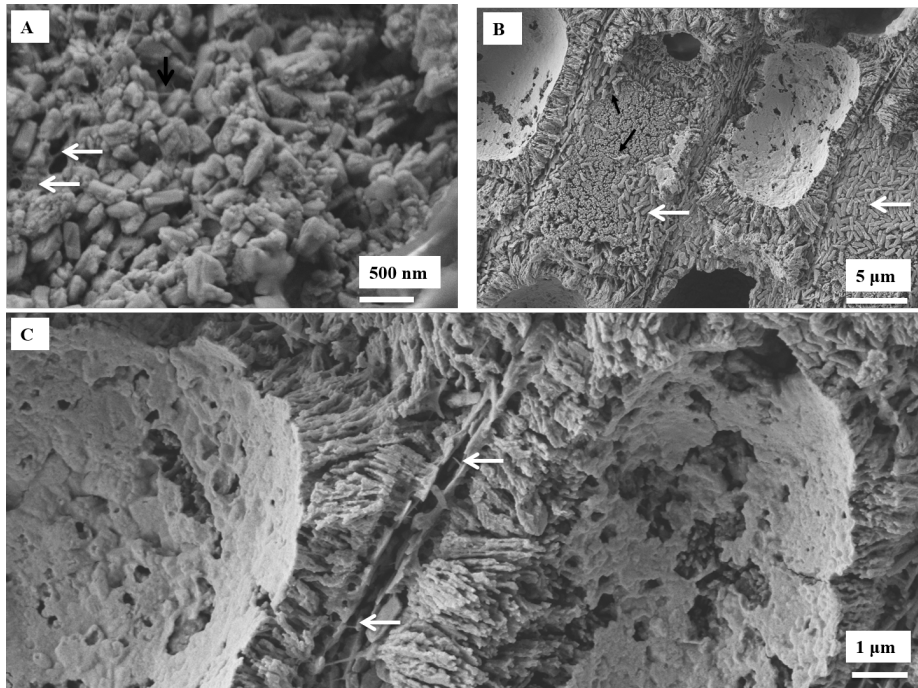

811

812 Figure 9: Interfilament structures in *K. epilaeve* (A) and *L. laeve* (B, C). A. *K. epilaeve* etched for 20  
 813 minutes. Fibrils (black arrow) and porous membrane (white arrows). B. *L. Laeve* etched for 20 minutes.  
 814 Interfilament grains are flattened against the external sides of the cell wall (white arrows) attached by  
 815 fibrils (black arrows). C. Fibrils visible stretched across the space between cell walls with 2 layers of  
 816 interfilament grains (white arrows).

817

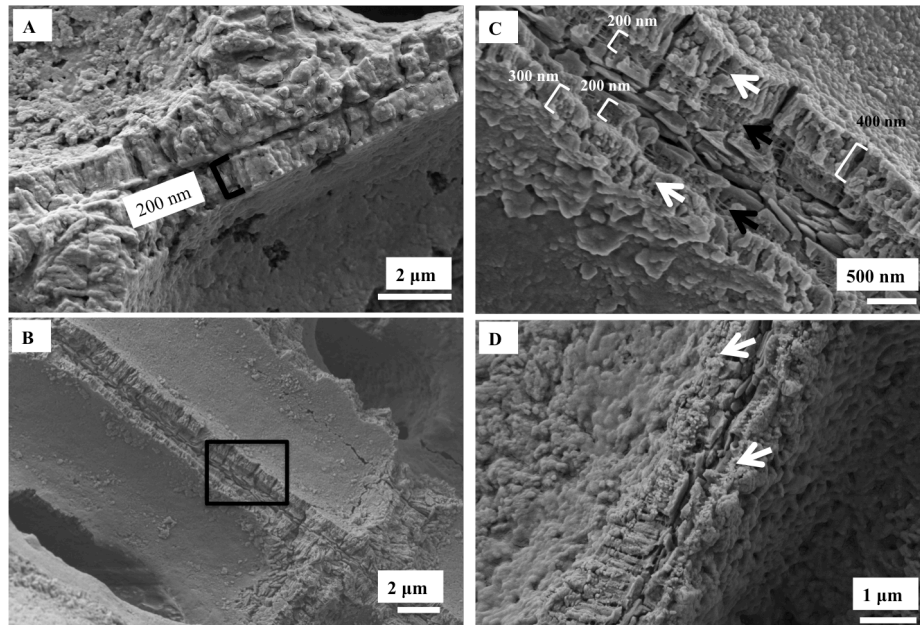

818

819 Figure 10: Hypothallus and transitional cells in *L. leave*. Cleaned 2 minutes. **A.** Hypothallus underside.

820 Organic film covering wall structures. Walls ~200 nm wide, roughly radial structure within cell wall. **B.**

821 Cleaned 2 minutes, hypothallus in upper crust. Roughly radial structure within cell walls. Black box

822 enlarged in C. **C.** The wall adjacent to the interfilament is narrowest at ~200 nm, has closely spaced organic

823 fibrils (black arrows) and is poorly calcified compared to the inner part of the wall (300-400 nm wide)

824 where radial grains are present. There are fibrils parallel to the cell wall appearing to go through the wall

825 grains similarly to the perithallial cell walls (white arrows). **D.** Transitional cell wall. The calcification in

826 the lower of the left side wall is comparable to the perithallial cell wall with radial grains. The right side

827 wall and upper part of the left side (white arrows) are poorly calcified and appear as a calcified membrane

828 rather than a properly developed cell wall.

829
